# Supplementary material
Source: PubMed Central journal article supplement (PMC3906809)
Supplement: ismej2013146x1.pdf [file ismej2013146x1.pdf]

## Supplementary materials

**Figure S1.** Total gene abundances, normalized to the abundance at 3200 m, of C-cycling gene families at each elevation. All data are presented as mean  $\pm$ s.e. calculated from biological triplicates. Significant ( $P<0.05$ ) differences among elevations are indicated by alphabetic letters above the bars.

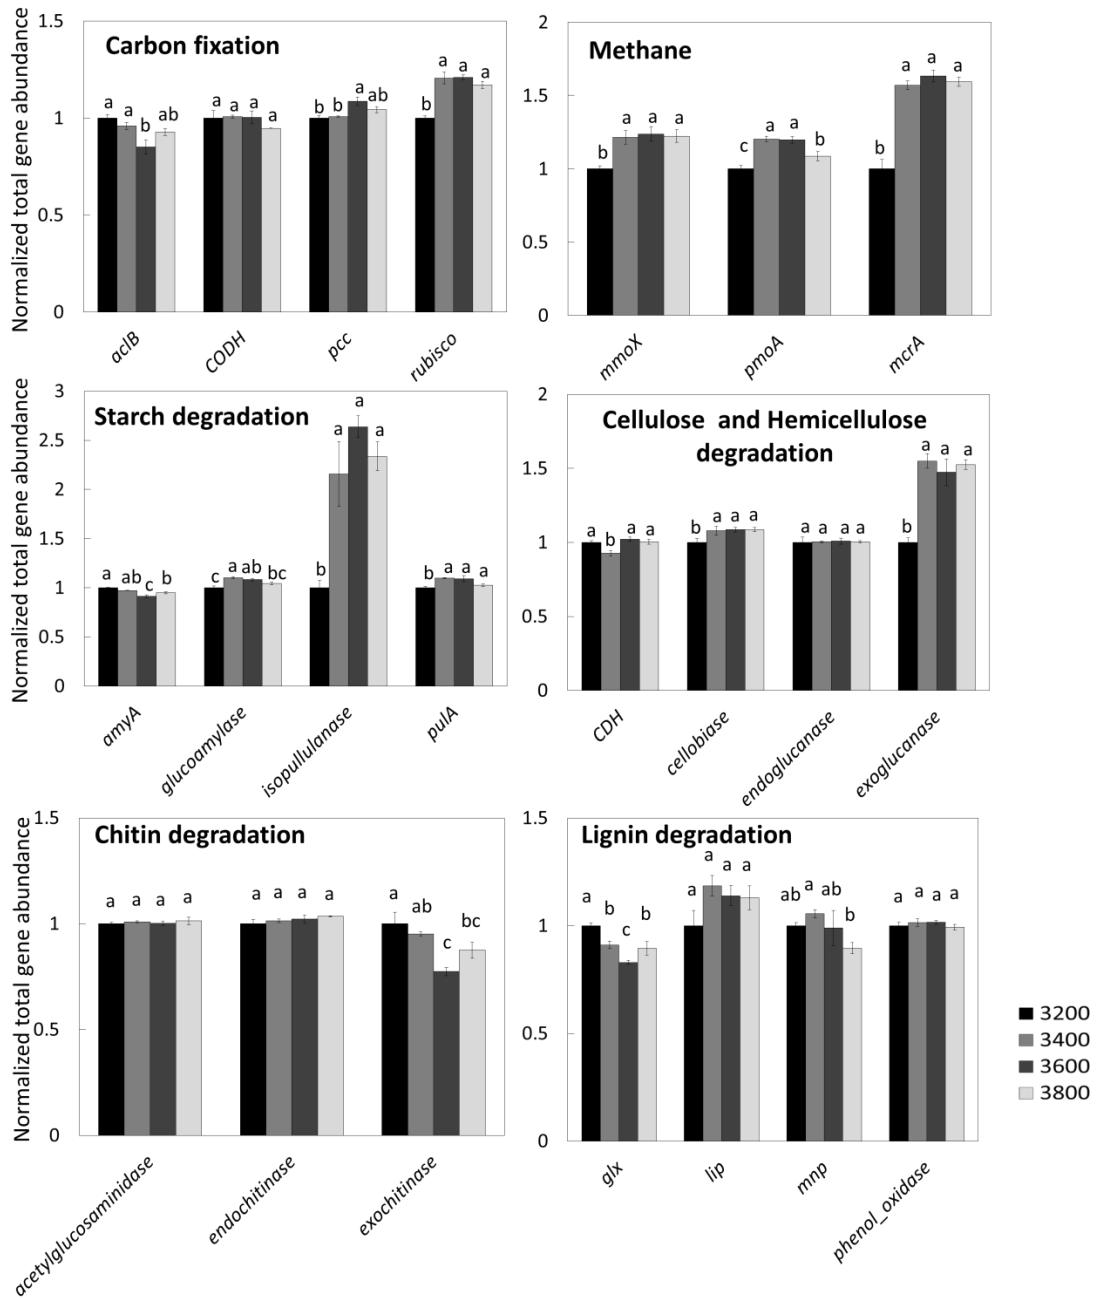

**Figure S2.** Percentages of genes detected at one (endemic), two, three and four (ubiquitous) elevations, which are shown as 12.0%, 11.7%, 32.1% and 44.1%, respectively.

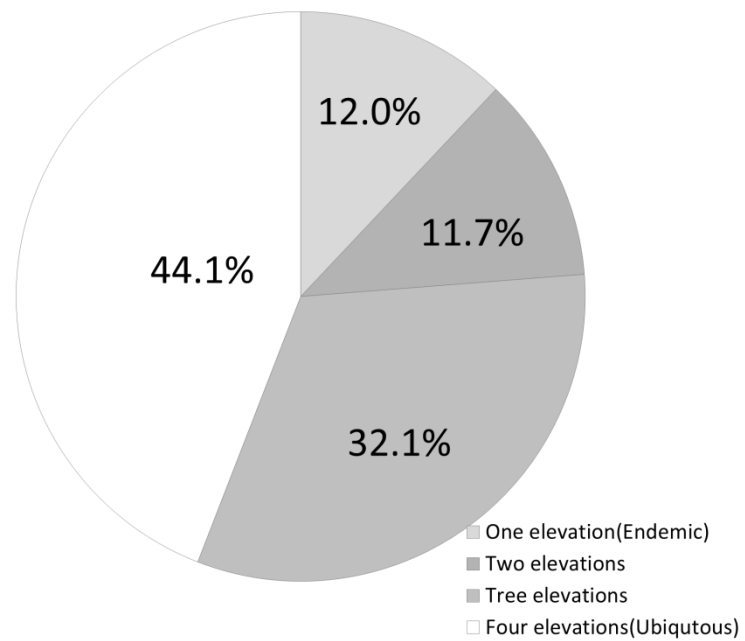

**Figure S3.** Changes of percentages of endemic genes along four elevations, as calculated by dividing the number of endemic genes in different categories by the total number of endemic genes.

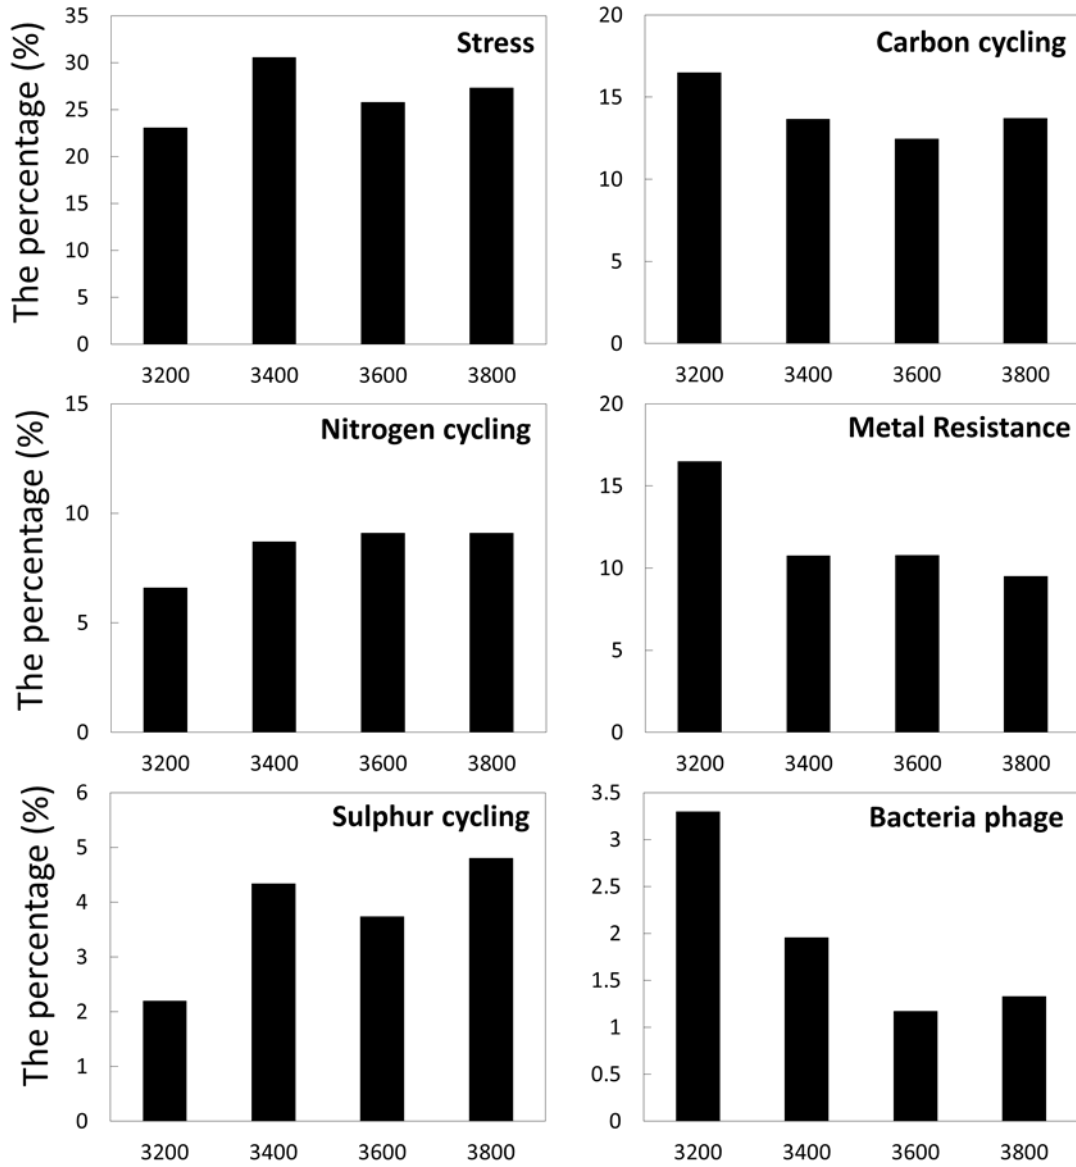

**Figure S4.** The correlation between alpha-diversity of microbial community and that of vegetation. The alpha-diversity was calculated by Simpson index. The Pearson correlation coefficient ( $r$ ) and the confidence level of  $P$ -value are indicated.

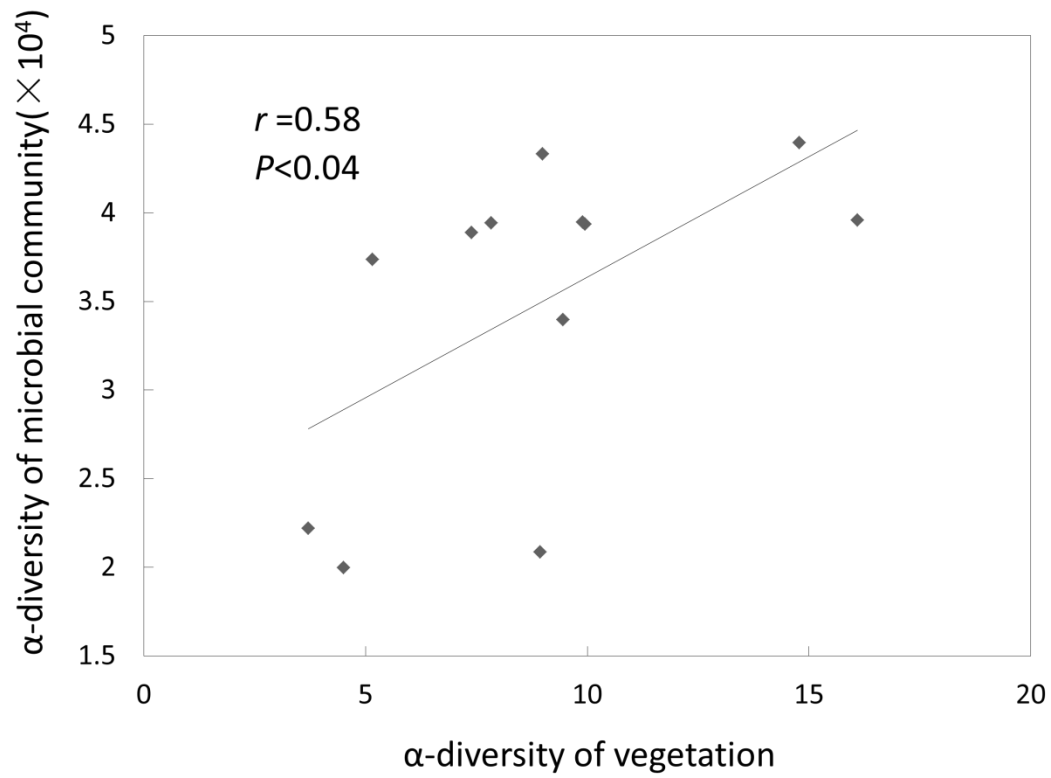

**Table S1.** Diversity indices of all functional genes in soil samples

|                                  | <b>3200 m</b>                  | <b>3400 m</b>         | <b>3600 m</b>         | <b>3800 m</b>          |
|----------------------------------|--------------------------------|-----------------------|-----------------------|------------------------|
| <b>Richeness<sup>a</sup></b>     | 23369                          | 45685                 | 42282                 | 41338                  |
| <b>Shannon Index<sup>b</sup></b> | 9.95 <sup>c</sup> <sup>d</sup> | 10.65 <sup>a</sup>    | 10.54 <sup>b</sup>    | 10.56 <sup>ab</sup>    |
| <b>Simpson Index<sup>c</sup></b> | 21009.73 <sup>c</sup>          | 42282.21 <sup>a</sup> | 37603.16 <sup>b</sup> | 38563.35 <sup>ab</sup> |

<sup>a</sup>Detected gene number.

<sup>b</sup>Shannon–Weiner index. Higher number represents higher diversity.

<sup>c</sup>Simpson’s index. Higher number represents higher diversity.

<sup>d</sup>Significant differences among elevations are indicated by alphabetic letters.

**Table S2.** Differences of microbial community among elevations as examined by the dissimilarity test of adonis.

| Sites (m) | Statistic $R^2$ | $P$ -value              |
|-----------|-----------------|-------------------------|
| 3200-3400 | 0.89            | <b>0.01<sup>a</sup></b> |
| 3200-3600 | 0.84            | <b>0.01</b>             |
| 3200-3800 | 0.89            | <b>0.01</b>             |
| 3400-3600 | 0.49            | <b>0.04</b>             |
| 3400-3800 | 0.63            | <b>0.01</b>             |
| 3600-3800 | 0.46            | 0.07                    |

<sup>a</sup>Boldface values indicate significant differences ( $P < 0.05$ ).

**Table S3.** The numbers and percentages of overlapping and unique genes among four elevations

| Sites | 3200                       | 3400               | 3600               | 3800               |
|-------|----------------------------|--------------------|--------------------|--------------------|
| 3200  | <b>91(0.4)<sup>a</sup></b> | <i>23108(50.3)</i> | <i>22311(51.5)</i> | <i>22516(53.4)</i> |
| 3400  |                            | <b>3529(7.7)</b>   | <i>39559(81.7)</i> | <i>38975(81.1)</i> |
| 3600  |                            |                    | <b>1364(3.2)</b>   | <i>38122(83.8)</i> |
| 3800  |                            |                    |                    | <b>978(2.4)</b>    |

<sup>a</sup>Values in parentheses are percentages. Italicized values indicate the number of overlapping genes between sites; boldface values indicate the number of unique genes at each site.

**Table S4.** Summary of environmental attribute measurements.

| <b>Environmental attribute (unit)</b>                             | <b>3200</b>        | <b>3400</b> | <b>3600</b> | <b>3800</b> |
|-------------------------------------------------------------------|--------------------|-------------|-------------|-------------|
| <b>Elevation (m)</b>                                              | 3200               | 3400        | 3600        | 3800        |
| <b>T5<sup>a</sup> (°C)</b>                                        | 13.99              | 12.36       | 10.64       | 9.36        |
| <b>T10 (°C)</b>                                                   | 12.43              | 9.15        | 8.88        | 6.84        |
| <b>AT (°C)</b>                                                    | 8.87               | 8.61        | 7.87        | 6.78        |
| <b>Moisture (%)</b>                                               | 22.4a <sup>b</sup> | 21.94a      | 25.63a      | 31.73a      |
| <b>NO<sub>3</sub><sup>-</sup>-N10 (mg kg<sup>-1</sup>)</b>        | 0.93b              | 0.84b       | 1.59a       | 1.38a       |
| <b>NH<sub>4</sub><sup>+</sup>-N10 (mg kg<sup>-1</sup>)</b>        | 3.7a               | 2.08b       | 1.98b       | 1.5b        |
| <b>TOC10 (%)</b>                                                  | 6.84a              | 6.3b        | 5.99c       | 5.59d       |
| <b>TN10 (g kg<sup>-1</sup>)</b>                                   | 5.35b              | 5.54a       | 5.12c       | 4.71d       |
| <b>TOC20 (%)</b>                                                  | 3.44d              | 3.73c       | 4.93a       | 4.51b       |
| <b>TN20 (g kg<sup>-1</sup>)</b>                                   | 3.45c              | 3.49c       | 4.09b       | 4.21a       |
| <b>SIN (mg kg<sup>-1</sup>)</b>                                   | 4.63a              | 2.92b       | 3.57b       | 2.88b       |
| <b>Total coverage of vegetation (%)</b>                           | 97.33a             | 98a         | 72b         | 77b         |
| <b>Vegetation species</b>                                         | 23.33a             | 25a         | 16.67b      | 13.67b      |
| <b>Vegetation diversity<sup>c</sup></b>                           | 1.91d              | 2.58a       | 2.36b       | 2.06c       |
| <b>Vegetation biomass (g)</b>                                     | 88.55a             | 33.7b       | 41.88b      | 28.38b      |
| <b>Released CH<sub>4</sub> (µg m<sup>-2</sup> h<sup>-1</sup>)</b> | -23.85ab           | -38.80b     | -           | -12.98a     |
| <b>Released CO<sub>2</sub> (µg m<sup>-2</sup> h<sup>-1</sup>)</b> | 799.02a            | 843.48a     | -           | 408.59b     |
| <b>Released N<sub>2</sub>O (µg m<sup>-2</sup> h<sup>-1</sup>)</b> | 13.02a             | 0.16b       | -           | 1.38b       |

<sup>a</sup>Abbreviations: T – temperature; AT – air temperature; TOC – total organic C; TN – total N; SIN – soil inorganic N; 5, 10 and 20 – soil characteristics measured at depths of 5, 10 or 20 cm;

<sup>b</sup>Significant differences among elevations are indicated by alphabetic letters.

<sup>c</sup>Vegetation diversity was calculated by Shannon index.



**Table S5.** The numbers and total abundances of endemic genes at different elevations.

| <b>Endemic genes</b>        | <b>3200</b> | <b>3400</b> | <b>3600</b> | <b>3800</b> |
|-----------------------------|-------------|-------------|-------------|-------------|
| <b>Gene number</b>          | 91          | 3529        | 1364        | 978         |
| <b>Total gene abundance</b> | 328407      | 5709897     | 1989096     | 1564756     |
